# Supplementary material for: High Milk Somatic Cell Counts and Increased Teladorsagia Burdens Overshadow Non-Infection-Related Factors as Predictors of Fat and Protein Content of Bulk-Tank Raw Milk in Sheep and Goat Farms
Source: MDPI journal article supplement (doi:10.3390/foods11030443), 2022-02-02
Supplement: s1 [file s1]

# High Milk Somatic Cell Counts and Increased Teladorsagia Burdens Overshadow Non-Infection Related Factors as Predictors of Fat and Protein Content of Bulk-Tank Raw Milk in Sheep and Goat Farms

Daphne T. Lianou, Charalambia K. Michael, Dimitris A. Gougoulis, Peter J. Cripps, Natalia G.C. Vasileiou, Nikolaos Solomakos, Efthymia Petinaki, Angeliki I. Katsafadou, Elisavet Angelidou, Konstantinos Arsenopoulos, Elias Papadopoulos, Marzia Albenzio, Vasia S. Mavrogianni, Mariangela Caroprese and George C. Fthenakis

**Table S1.** Husbandry-related variables ( $n = 37$ ) evaluated for potential association with fat and protein content in the bulk-tank raw milk of 325 sheep and 119 goat farms during a countrywide investigation in Greece.

---

|                                                                                                    |
|----------------------------------------------------------------------------------------------------|
| Management system applied in the farm (description according to EFSA classification <sup>1</sup> ) |
| Month into the lactation period at sampling (month)                                                |
| Availability of straw bedding (yes / no)                                                           |
| Availability of mechanical ventilators (yes / no)                                                  |
| Grazing practiced (yes / no)                                                                       |
| Grazing land available to animals (acres per animal)                                               |
| Availability of milking parlour (yes / no)                                                         |
| Number of milking units in the parlour (no.)                                                       |
| Number of available milking units per animal position (no.)                                        |
| System pressure (kPa.)                                                                             |
| Type of flow line (low / high / other)                                                             |
| No. of female animals in the farm (no.)                                                            |
| Breed of ewes /does (description)                                                                  |
| Average age of culling female animals (years)                                                      |
| Total milk quantity per ewe / doe obtained during the preceding milking period (litres)            |
| Average number of lambs / kids born per ewe / doe (no.)                                            |
| Collaboration with a veterinarian (yes / no)                                                       |
| Clinical mastitis annual incidence risk in the flock / herd (%)                                    |
| Application of reproductive control practices in the farm (yes / no)                               |
| Nutritional modifications performed according to the reproductive stage (yes / no)                 |
| Method for drying-off at the end of the lactation period (abrupt / progressive)                    |
| Age of lamb / kid removal from their dams (days)                                                   |
| Daily number of milking sessions (no.)                                                             |
| Number of feet care sessions provided annually to the female animals annually (no.)                |
| Shearing of animals (yes / no)                                                                     |
| Vaccination against mastitis (yes / no)                                                            |
| Vaccination against contagious agalactia (yes / no)                                                |
| Administration of anthelmintic treatment during the last stage of pregnancy (yes / no)             |
| Duration of grazing during the year (no. of months)                                                |

Provision of hay as fodder to animals (yes / no)

Average quantity of hay provided daily to animals during the preceding season (kg)

Provision of straw to animals (yes / no)

Provision of silage to adult animals (yes / no)

Provision of finished feed (concentrate) to adult animals (yes / no)

Provision of finished feed (concentrate) to adult animals throughout the year (yes / no)

Type of finished feed (concentrate) provided to adult animals (description)

Average quantity of finished feed (concentrate) provided daily to animals during the preceding season (kg)

---

<sup>1</sup> management system classified as intensive, semi-intensive, semi-extensive, extensive (European Food Safety Authority. Scientific opinion on the welfare risks related to the farming of sheep for wool, meat and milk production. *EFSA J.* **2014**, *12*, 3933–4060.).

**Table S2.** Human resources-related variables (*n* = 6) evaluated for potential association with fat and protein content in the bulk-tank raw milk of 325 sheep and 119 goat farms during a countrywide investigation in Greece.

---

|                                                      |
|------------------------------------------------------|
| Age of farmer (years)                                |
| Length of previous animal farming experience (years) |
| General education (description)                      |
| Farmer by profession (yes / no)                      |
| Family tradition in farming (yes / no)               |
| Presence of working staff in the farm (yes/no)       |

---

**Table S3.** Details of multivariable models employed for the evaluation of the fat and protein content in the bulk-tank raw milk of 325 sheep and 119 goat farms during a countrywide investigation in Greece.

| Outcome                                                                               | Variables offered to the multivariable models ( <i>n</i> ) | Variables required in the final models                                                                                                                                                                                                                                                                                                                                                                     |
|---------------------------------------------------------------------------------------|------------------------------------------------------------|------------------------------------------------------------------------------------------------------------------------------------------------------------------------------------------------------------------------------------------------------------------------------------------------------------------------------------------------------------------------------------------------------------|
| Fat content – sheep milk                                                              | 16                                                         | (a) Month into the lactation period at sampling, (b) Breed of ewes, (c) Age of lamb removal from their dams, (d) Provision of finished feed (concentrate) to adult animals throughout the year, (e) Length of previous animal farming experience of the farmer, (f) presence of working staff in the farm                                                                                                  |
| Protein content – sheep milk                                                          | 21                                                         | (a) Somatic cell counts in bulk tank milk, (b) Proportion of <i>Teladorsagia</i> larvae in faecal samples, (c) Management system applied in the farm, (d) Month into the lactation period at sampling, (e) Administration of anthelmintic treatment during the last stage of pregnancy, (f) Provision of finished feed (concentrate) to adult animals throughout the year, (g) General education of farmer |
| Fat content – goat milk                                                               | 11                                                         | (a) Somatic cell counts in bulk tank milk, (b) Total bacterial counts in bulk-tank milk, (c) Month into the lactation period at sampling, (d) Breed of does, (e) Collaboration with a veterinarian, (f) Age of kid removal from their dams, (g) General education of farmer                                                                                                                                |
| Protein content – goat milk                                                           | 8                                                          | (a) Somatic cell counts in bulk tank milk, (b) Proportion of <i>Teladorsagia</i> larvae in faecal samples, (c) Month into the lactation period at sampling, (d) Duration of grazing during the year                                                                                                                                                                                                        |
| Fat and protein content concurrently above the average contents of all flocks - sheep | 8                                                          | (a) Somatic cell counts in bulk tank milk, (b) epg counts in faecal samples, (c) Collaboration with a veterinarian, (d) General education of the farmer                                                                                                                                                                                                                                                    |
| Fat and protein content concurrently above the average contents of all herds - goats  | 5                                                          | (a) Somatic cell counts in bulk tank milk, (b) Proportion of <i>Teladorsagia</i> larvae in faecal samples, (c) Month into the lactation period at sampling, (d) Breed of does                                                                                                                                                                                                                              |

**Table S4.** Effects of husbandry- and human resources-related factors ( $n = 43$ ) in the fat content (%) in the bulk-tank raw milk of 325 sheep flocks in Greece.

| Management system applied in the farm                 |                                    |                                |                     |          |
|-------------------------------------------------------|------------------------------------|--------------------------------|---------------------|----------|
| Intensive (n = 43)                                    | Semi-intensive (n = 151)           | Semi-extensive (n = 107)       | Extensive (n = 24)  | <i>p</i> |
| 6.03 ± 0.09                                           | 6.24 ± 0.06                        | 6.11 ± 0.09                    | 6.16 ± 0.23         | 0.44     |
| Month into the lactation period at sampling           |                                    |                                |                     |          |
| 0 – 1st (n = 23)                                      | 2nd – 5th (n = 138)                | 6th – 9th (n = 147)            | After 9th (n = 17)  | <i>p</i> |
| 5.77 ± 0.13                                           | 6.13 ± 0.07                        | 6.25 ± 0.07                    | 6.23 ± 0.33         | 0.07     |
| Availability of straw bedding                         |                                    |                                |                     |          |
| Yes (n = 268)                                         | No (n = 57)                        |                                |                     | <i>p</i> |
| 6.14 ± 0.05                                           | 6.28 ± 0.12                        |                                |                     | 0.24     |
| Availability of mechanical ventilators                |                                    |                                |                     |          |
| Yes (n = 47)                                          | No (n = 278)                       |                                |                     | <i>p</i> |
| 6.12 ± 0.12                                           | 6.17 ± 0.05                        |                                |                     | 0.67     |
| Grazing practiced                                     |                                    |                                |                     |          |
| Yes (n = 281)                                         | No (n = 44)                        |                                |                     | <i>p</i> |
| 6.19 ± 0.05                                           | 6.00 ± 0.09                        |                                |                     | 0.15     |
| Grazing land available to animals                     |                                    |                                |                     |          |
| ≤ 0.50 ac. per animal (n = 118)                       | 0.51-2.00 ac. per animal (n = 130) | > 2.00 ac. per animal (n = 77) |                     | <i>P</i> |
| 6.03 ± 0.06                                           | 6.32 ± 0.07                        | 6.10 ± 0.12                    |                     | 0.022    |
| Availability of milking parlour                       |                                    |                                |                     |          |
| Yes (n = 255)                                         | No (n = 70)                        |                                |                     | <i>p</i> |
| 6.15 ± 0.05                                           | 6.22 ± 0.11                        |                                |                     | 0.53     |
| Number of milking units in the parlour                |                                    |                                |                     |          |
| < 24 (n = 174)                                        | 24 (n = 65)                        | > 24 (n = 16)                  |                     | <i>p</i> |
| 6.18 ± 0.06                                           | 6.14 ± 0.10                        | 5.86 ± 0.18                    |                     | 0.33     |
| Number of available milking units per animal position |                                    |                                |                     |          |
| < 1 (n = 177)                                         | 1 (n = 78)                         |                                |                     | <i>p</i> |
| 6.21 ± 0.06                                           | 6.01 ± 0.09                        |                                |                     | 0.08     |
| System pressure                                       |                                    |                                |                     |          |
| < 38 kPa (n = 22)                                     | 38 - 42 kPa (n = 203)              | > 42 kPa (n = 30)              |                     | <i>p</i> |
| 6.05 ± 0.24                                           | 6.21 ± 0.06                        | 5.79 ± 0.15                    |                     | 0.029    |
| Type of flow line                                     |                                    |                                |                     |          |
| High (n = 182)                                        | Low (n = 55)                       | Other (n = 18)                 |                     | <i>p</i> |
| 6.18 ± 0.06                                           | 6.12 ± 0.12                        | 5.94 ± 0.19                    |                     | 0.48     |
| No. of ewes in the flock                              |                                    |                                |                     |          |
| ≤ 165 ewes (n = 88)                                   | 166 - 330 ewes (n = 120)           | 331 - 500 ewes (n = 66)        | > 500 ewes (n = 51) | <i>p</i> |
| 6.02 ± 0.10                                           | 6.28 ± 0.07                        | 6.22 ± 0.11                    | 6.08 ± 0.11         | 0.13     |
| Breed of ewes                                         |                                    |                                |                     |          |
| Assaf (n = 30)                                        | Awassi (n = 1)                     | Boutsko (n = 2)                | Chios (n = 44)      | <i>p</i> |
| 6.06 ± 0.12                                           | 5.43                               | 6.55 ± 1.14                    | 5.73 ± 0.15         | < 0.0001 |
| Crossbreeds (n = 43)                                  | Friesarta (n = 12)                 | Friesian (n = 13)              | Karagouniko (n = 5) |          |
| 6.16 ± 0.11                                           | 5.89 ± 0.15                        | 6.41 ± 0.22                    | 5.63 ± 0.62         |          |

|                                                                          |                        |                    |                   |
|--------------------------------------------------------------------------|------------------------|--------------------|-------------------|
| Kefallinia (n = 1)                                                       | Lacaune (n = 95)       | Local (n = 55)     | Mytilini (n = 18) |
| 5.12                                                                     | 6.30 ± 0.08            | 6.20 ± 0.12        | 6.89 ± 0.15       |
| Sfakia (n = 6)                                                           |                        |                    |                   |
| 5.78 ± 0.23                                                              |                        |                    |                   |
| Average age of culling ewes                                              |                        |                    |                   |
| ≤ 6 years (n = 226)                                                      | > 6 years (n = 99)     |                    | p                 |
| 6.17 ± 0.06                                                              | 6.16 ± 0.08            |                    | 0.92              |
| Total milk quantity per ewe obtained during the preceding milking period |                        |                    |                   |
| ≤ 200 L (n = 174)                                                        | 201 - 400 L (n = 140)  | > 400 L (n = 11)   | p                 |
| 6.18 ± 0.07                                                              | 6.13 ± 0.07            | 6.33 ± 0.18        | 0.61              |
| Average number of lambs born per ewe                                     |                        |                    |                   |
| ≤ 1.50 (n = 280)                                                         | > 1.50 (n = 45)        |                    | p                 |
| 6.16 ± 0.05                                                              | 6.20 ± 0.13            |                    | 0.73              |
| Collaboration with a veterinarian                                        |                        |                    |                   |
| Yes (n = 277)                                                            | No (n = 48)            |                    | p                 |
| 6.17 ± 0.05                                                              | 6.10 ± 0.14            |                    | 0.59              |
| Clinical mastitis annual incidence risk in the flock                     |                        |                    |                   |
| ≤ 0.50% (n = 269)                                                        | > 0.50% (n = 56)       |                    | p                 |
| 6.15 ± 0.10                                                              | 6.15 ± 0.05            |                    | 0.91              |
| Application of reproductive control practices in the farm                |                        |                    |                   |
| Yes (n = 100)                                                            | No (n = 225)           |                    | p                 |
| 6.11 ± 0.08                                                              | 6.19 ± 0.06            |                    | 0.38              |
| Nutritional modifications performed according to the reproductive stage  |                        |                    |                   |
| Yes (n = 229)                                                            | No (n = 96)            |                    | p                 |
| 6.16 ± 0.05                                                              | 6.17 ± 0.09            |                    | 0.90              |
| Method for drying-off at the end of the lactation period                 |                        |                    |                   |
| Abrupt (n = 12)                                                          | Progressive (n = 313)  |                    | p                 |
| 6.25 ± 0.20                                                              | 6.16 ± 0.05            |                    | 0.70              |
| Age of lamb removal from their dams                                      |                        |                    |                   |
| < 45 days (n = 119)                                                      | 45 – 60 days (n = 170) | > 60 days (n = 36) | p                 |
| 6.22 ± 0.07                                                              | 6.19 ± 0.07            | 5.86 ± 0.17        | 0.07              |
| Daily number of milking sessions                                         |                        |                    |                   |
| One (n = 1)                                                              | Two (n = 264)          | Three (n = 60)     | p                 |
| 6.85                                                                     | 6.17 ± 0.05            | 6.13 ± 0.09        | 0.75              |
| Number of feet care sessions provided to the ewes annually               |                        |                    |                   |
| No feet care provided (n = 102)                                          | 1 - 2 (n = 203)        | > 2 (n = 20)       | p                 |
| 6.22 ± 0.09                                                              | 6.10 ± 0.06            | 6.52 ± 0.14        | 0.07              |
| Shearing of animals                                                      |                        |                    |                   |
| Yes (n = 319)                                                            | No (n = 6)             |                    | p                 |
| 6.16 ± 0.05                                                              | 6.31 ± 0.41            |                    | 0.68              |
| Vaccination against mastitis                                             |                        |                    |                   |
| Yes (n = 126)                                                            | No (n = 199)           |                    | p                 |
| 6.18 ± 0.07                                                              | 6.15 ± 0.06            |                    | 0.77              |

| Vaccination against contagious agalactia                                                              |                                        |                         |                          |                   |          |
|-------------------------------------------------------------------------------------------------------|----------------------------------------|-------------------------|--------------------------|-------------------|----------|
| Yes (n = 186)                                                                                         |                                        | No (n = 139)            |                          | <i>p</i>          |          |
| 6.16 ± 0.06                                                                                           |                                        | 6.17 ± 0.08             |                          | 0.97              |          |
| Administration of anthelmintic treatment during the last stage of pregnancy                           |                                        |                         |                          |                   |          |
| Yes (n = 224)                                                                                         |                                        | No (n = 101)            |                          | <i>p</i>          |          |
| 6.20 ± 0.05                                                                                           |                                        | 6.08 ± 0.09             |                          | 0.23              |          |
| Duration of grazing during the year                                                                   |                                        |                         |                          |                   |          |
| No grazing (n = 44)                                                                                   | 1 - 5 months (n = 46)                  | 6 - 10 months (n = 124) | 11 - 12 months (n = 111) | <i>p</i>          |          |
| 6.11 ± 0.09                                                                                           | 6.06 ± 0.13                            | 6.21 ± 0.07             | 6.17 ± 0.09              | 0.72              |          |
| Provision of hay as fodder to animals                                                                 |                                        |                         |                          |                   |          |
| Yes (n = 324)                                                                                         |                                        | No (n = 1)              |                          | <i>p</i>          |          |
| 6.16 ± 0.05                                                                                           |                                        | 6.63                    |                          | 0.44              |          |
| Average quantity of hay provided daily to animals during the preceding season                         |                                        |                         |                          |                   |          |
| ≤ 0.6 kg (n = 109)                                                                                    |                                        | > 0.6 kg (n = 216)      |                          | <i>p</i>          |          |
| 6.26 ± 0.09                                                                                           |                                        | 6.11 ± 0.05             |                          | 0.13              |          |
| Provision of straw to animals                                                                         |                                        |                         |                          |                   |          |
| Yes (n = 258)                                                                                         |                                        | No (n = 67)             |                          | <i>p</i>          |          |
| 6.18 ± 0.05                                                                                           |                                        | 6.11 ± 0.14             |                          | 0.57              |          |
| Provision of silage to adult animals                                                                  |                                        |                         |                          |                   |          |
| Yes (n = 72)                                                                                          |                                        | No (n = 253)            |                          | <i>p</i>          |          |
| 6.18 ± 0.09                                                                                           |                                        | 6.16 ± 0.05             |                          | 0.90              |          |
| Provision of finished feed (concentrate) to adult animals                                             |                                        |                         |                          |                   |          |
| Yes (n = 321)                                                                                         |                                        | No (n = 4)              |                          | <i>p</i>          |          |
| 6.17 ± 0.05                                                                                           |                                        | 6.02 ± 0.63             |                          | 0.73              |          |
| Provision of finished feed (concentrate) to adult animals throughout the year                         |                                        |                         |                          |                   |          |
| Yes (n = 219)                                                                                         |                                        | No (n = 106)            |                          | <i>p</i>          |          |
| 6.09 ± 0.05                                                                                           |                                        | 6.34 ± 0.09             |                          | 0.012             |          |
| Type of finished feed (concentrate) to adult animals                                                  |                                        |                         |                          |                   |          |
| Mash (n = 122)                                                                                        | Pelleted (n = 101)                     | Flakes (n = 4)          | Crumbled (n = 87)        | Other (n = 7)     | <i>p</i> |
| 6.09 ± 0.07                                                                                           | 6.08 ± 0.08                            | 6.45 ± 0.38             | 6.38 ± 0.09              | 5.83 ± 0.39       | 0.05     |
| Average quantity of finished feed (concentrate) provided daily to animals during the preceding season |                                        |                         |                          |                   |          |
| ≤ 0.6 kg (n = 140)                                                                                    |                                        | 0.61 – 1.2 kg (n = 148) |                          | > 1.2 kg (n = 37) | <i>p</i> |
| 6.22 ± 0.07                                                                                           |                                        | 6.10 ± 0.07             |                          | 6.20 ± 0.12       | 0.42     |
| Age of farmer                                                                                         |                                        |                         |                          |                   |          |
| Up to 50 years (n = 197)                                                                              |                                        | Over 50 years (n = 128) |                          | <i>p</i>          |          |
| 6.18 ± 0.06                                                                                           |                                        | 6.14 ± 0.07             |                          | 0.74              |          |
| Length of previous animal farming experience                                                          |                                        |                         |                          |                   |          |
| ≤ 5 years (n = 74)                                                                                    |                                        | > 5 years (n = 251)     |                          | <i>p</i>          |          |
| 5.94 ± 0.10                                                                                           |                                        | 6.23 ± 0.05             |                          | 0.008             |          |
| General education of farmer                                                                           |                                        |                         |                          |                   |          |
| Primary (n = 57)                                                                                      | Secondary and post-secondary (n = 225) |                         | Tertiary (n = 43)        |                   | <i>p</i> |
| 6.17 ± 0.10                                                                                           | 6.15 ± 0.06                            |                         | 6.21 ± 0.13              |                   | 0.92     |

| Farmer by profession                  |              |  |          |
|---------------------------------------|--------------|--|----------|
| Yes (n = 292)                         | No (n = 33)  |  | <i>p</i> |
| 6.18 ± 0.05                           | 6.03 ± 0.14  |  | 0.33     |
| Family tradition in farming           |              |  |          |
| Yes (n = 283)                         | No (n = 42)  |  | <i>p</i> |
| 6.19 ± 0.05                           | 5.98 ± 0.11  |  | 0.13     |
| Presence of working staff in the farm |              |  |          |
| Yes (n = 123)                         | No (n = 202) |  | <i>p</i> |
| 6.01 ± 0.07                           | 6.26 ± 0.06  |  | 0.008    |

**Table S5.** Effects of husbandry- and human resources-related factors ( $n = 43$ ) in the protein content (%) in the bulk-tank raw milk of 325 sheep flocks in Greece.

| Management system applied in the farm                 |                                    |                                |                     |          |
|-------------------------------------------------------|------------------------------------|--------------------------------|---------------------|----------|
| Intensive (n = 43)                                    | Semi-intensive (n = 151)           | Semi-extensive (n = 107)       | Extensive (n = 24)  | <i>p</i> |
| 4.46 ± 0.02                                           | 4.47 ± 0.02                        | 4.38 ± 0.02                    | 4.32 ± 0.04         | 0.021    |
| Month into the lactation period at sampling           |                                    |                                |                     |          |
| 0 – 1st (n = 23)                                      | 2nd – 5th (n = 138)                | 6th – 9th (n = 147)            | After 9th (n = 17)  | <i>p</i> |
| 4.42 ± 0.07                                           | 4.47 ± 0.02                        | 4.40 ± 0.02                    | 4.33 ± 0.06         | 0.045    |
| Availability of straw bedding                         |                                    |                                |                     |          |
| Yes (n = 268)                                         | No (n = 57)                        |                                |                     | <i>p</i> |
| 4.44 ± 0.02                                           | 4.37 ± 0.04                        |                                |                     | 0.09     |
| Availability of mechanical ventilators                |                                    |                                |                     |          |
| Yes (n = 47)                                          | No (n = 278)                       |                                |                     | <i>p</i> |
| 4.45 ± 0.03                                           | 4.42 ± 0.02                        |                                |                     | 0.53     |
| Grazing practiced                                     |                                    |                                |                     |          |
| Yes (n = 281)                                         | No (n = 44)                        |                                |                     | <i>p</i> |
| 4.42 ± 0.02                                           | 4.47 ± 0.02                        |                                |                     | 0.91     |
| Grazing land available to animals                     |                                    |                                |                     |          |
| ≤ 0.50 ac. per animal (n = 118)                       | 0.51-2.00 ac. per animal (n = 130) | > 2.00 ac. per animal (n = 77) |                     | <i>p</i> |
| 4.46 ± 0.02                                           | 4.42 ± 0.02                        | 4.38 ± 0.03                    |                     | 0.09     |
| Availability of milking parlour                       |                                    |                                |                     |          |
| Yes (n = 255)                                         | No (n = 70)                        |                                |                     | <i>p</i> |
| 4.45 ± 0.02                                           | 4.35 ± 0.03                        |                                |                     | 0.005    |
| Number of milking units in the parlour                |                                    |                                |                     |          |
| < 24 (n = 174)                                        | 24 (n = 65)                        | > 24 (n = 16)                  |                     | <i>p</i> |
| 4.46 ± 0.02                                           | 4.40 ± 0.03                        | 4.45 ± 0.06                    |                     | 0.20     |
| Number of available milking units per animal position |                                    |                                |                     |          |
| < 1 (n = 177)                                         | 1 (n = 78)                         |                                |                     | <i>p</i> |
| 4.45 ± 0.02                                           | 4.43 ± 0.03                        |                                |                     | 0.58     |
| System pressure                                       |                                    |                                |                     |          |
| < 38 kPa (n = 22)                                     | 38 - 42 kPa (n = 203)              | > 42 kPa (n = 30)              |                     | <i>p</i> |
| 4.44 ± 0.07                                           | 4.44 ± 0.02                        | 4.48 ± 0.04                    |                     | 0.76     |
| Type of flow line                                     |                                    |                                |                     |          |
| High (n = 182)                                        | Low (n = 55)                       | Other (n = 18)                 |                     | <i>p</i> |
| 4.45 ± 0.02                                           | 4.41 ± 0.03                        | 4.54 ± 0.04                    |                     | 0.14     |
| No. of ewes in the flock                              |                                    |                                |                     |          |
| ≤ 165 ewes (n = 88)                                   | 166 - 330 ewes (n = 120)           | 331 - 500 ewes (n = 66)        | > 500 ewes (n = 51) | <i>p</i> |
| 4.42 ± 0.03                                           | 4.45 ± 0.03                        | 4.40 ± 0.02                    | 4.42 ± 0.04         | 0.61     |
| Breed of ewes                                         |                                    |                                |                     |          |
| Assaf (n = 30)                                        | Awassi (n = 1)                     | Boutsko (n = 2)                | Chios (n = 44)      | <i>p</i> |
| 4.36 ± 0.03                                           | 4.73                               | 4.60 ± 0.05                    | 4.47 ± 0.04         | 0.24     |
| Crossbreeds (n = 43)                                  | Friesarta (n = 12)                 | Friesian (n = 13)              | Karagouniko (n = 5) |          |
| 4.42 ± 0.06                                           | 4.51 ± 0.06                        | 4.37 ± 0.09                    | 4.35 ± 0.11         |          |

|                                                                                 |                        |                       |                   |
|---------------------------------------------------------------------------------|------------------------|-----------------------|-------------------|
| Kefallinia (n = 1)                                                              | Lacaune (n = 95)       | Local (n = 55)        | Mytilini (n = 18) |
| 4.55                                                                            | 4.47 ± 0.03            | 4.39 ± 0.03           | 4.35 ± 0.03       |
| Sfakia (n = 6)                                                                  |                        |                       |                   |
| 4.35 ± 0.04                                                                     |                        |                       |                   |
| <b>Average age of culling ewes</b>                                              |                        |                       |                   |
| ≤ 6 years (n = 226)                                                             |                        | > 6 years (n = 99)    | <i>p</i>          |
| 4.43 ± 0.02                                                                     |                        | 4.42 ± 0.03           | 0.84              |
| <b>Total milk quantity per ewe obtained during the preceding milking period</b> |                        |                       |                   |
| ≤ 200 L (n = 174)                                                               | 201 - 400 L (n = 140)  | > 400 L (n = 11)      | <i>p</i>          |
| 4.43 ± 0.02                                                                     | 4.42 ± 0.02            | 4.41 ± 0.05           | 0.73              |
| <b>Average number of lambs born per ewe</b>                                     |                        |                       |                   |
| ≤ 1.50 (n = 280)                                                                |                        | > 1.50 (n = 45)       | <i>p</i>          |
| 4.42 ± 0.02                                                                     |                        | 4.48 ± 0.03           | 0.14              |
| <b>Collaboration with a veterinarian</b>                                        |                        |                       |                   |
| Yes (n = 277)                                                                   |                        | No (n = 48)           | <i>p</i>          |
| 4.44 ± 0.02                                                                     |                        | 4.37 ± 0.04           | 0.09              |
| <b>Clinical mastitis annual incidence risk in the flock</b>                     |                        |                       |                   |
| ≤ 0.50% (n = 269)                                                               |                        | > 0.50% (n = 56)      | <i>p</i>          |
| 4.41 ± 0.03                                                                     |                        | 4.43 ± 0.02           | 0.59              |
| <b>Application of reproductive control practices in the farm</b>                |                        |                       |                   |
| Yes (n = 100)                                                                   |                        | No (n = 225)          | <i>p</i>          |
| 4.45 ± 0.02                                                                     |                        | 4.42 ± 0.02           | 0.26              |
| <b>Nutritional modifications performed according to the reproductive stage</b>  |                        |                       |                   |
| Yes (n = 229)                                                                   |                        | No (n = 96)           | <i>p</i>          |
| 4.44 ± 0.02                                                                     |                        | 4.38 ± 0.03           | 0.05              |
| <b>Method for drying-off at the end of the lactation period</b>                 |                        |                       |                   |
| Abrupt (n = 12)                                                                 |                        | Progressive (n = 313) | <i>p</i>          |
| 4.47 ± 0.04                                                                     |                        | 4.42 ± 0.01           | 0.59              |
| <b>Age of lamb removal from their dams</b>                                      |                        |                       |                   |
| < 45 days (n = 119)                                                             | 45 – 60 days (n = 170) | > 60 days (n = 36)    | <i>p</i>          |
| 4.46 ± 0.02                                                                     | 4.41 ± 0.02            | 4.37 ± 0.06           | 0.12              |
| <b>Daily number of milking sessions</b>                                         |                        |                       |                   |
| One (n = 1)                                                                     | Two (n = 264)          | Three (n = 60)        | <i>p</i>          |
| 4.45                                                                            | 4.42 ± 0.02            | 4.47 ± 0.03           | 0.15              |
| <b>Number of feet care sessions provided to the ewes annually</b>               |                        |                       |                   |
| No feet care provided (n = 102)                                                 | 1 - 2 (n = 203)        | > 2 (n = 20)          | <i>p</i>          |
| 4.39 ± 0.02                                                                     | 4.44 ± 0.02            | 4.44 ± 0.03           | 0.16              |
| <b>Shearing of animals</b>                                                      |                        |                       |                   |
| Yes (n = 319)                                                                   |                        | No (n = 6)            | <i>p</i>          |
| 4.42 ± 0.01                                                                     |                        | 4.55 ± 0.14           | 0.25              |
| <b>Vaccination against mastitis</b>                                             |                        |                       |                   |
| Yes (n = 126)                                                                   |                        | No (n = 199)          | <i>p</i>          |
| 4.43 ± 0.02                                                                     |                        | 4.42 ± 0.02           | 0.70              |

| Vaccination against contagious agalactia                                                              |                                        |                         |                          |                   |          |
|-------------------------------------------------------------------------------------------------------|----------------------------------------|-------------------------|--------------------------|-------------------|----------|
| Yes (n = 186)                                                                                         |                                        | No (n = 139)            |                          | <i>p</i>          |          |
| 4.44 ± 0.02                                                                                           |                                        | 4.41 ± 0.02             |                          | 0.43              |          |
| Administration of anthelmintic treatment during the last stage of pregnancy                           |                                        |                         |                          |                   |          |
| Yes (n = 224)                                                                                         |                                        | No (n = 101)            |                          | <i>p</i>          |          |
| 4.45 ± 0.02                                                                                           |                                        | 4.38 ± 0.03             |                          | 0.019             |          |
| Duration of grazing during the year                                                                   |                                        |                         |                          |                   |          |
| No grazing (n = 44)                                                                                   | 1 - 5 months (n = 46)                  | 6 - 10 months (n = 124) | 11 - 12 months (n = 111) | <i>p</i>          |          |
| 4.47 ± 0.02                                                                                           | 4.46 ± 0.04                            | 4.44 ± 0.02             | 4.38 ± 0.03              | 0.07              |          |
| Provision of hay as fodder to animals                                                                 |                                        |                         |                          |                   |          |
| Yes (n = 324)                                                                                         |                                        | No (n = 1)              |                          | <i>p</i>          |          |
| 4.43 ± 0.01                                                                                           |                                        | 4.34                    |                          | 0.62              |          |
| Average quantity of hay provided daily to animals during the preceding season                         |                                        |                         |                          |                   |          |
| ≤ 0.6 kg (n = 109)                                                                                    |                                        | > 0.6 kg (n = 216)      |                          | <i>p</i>          |          |
| 4.38 ± 0.02                                                                                           |                                        | 4.45 ± 0.02             |                          | 0.030             |          |
| Provision of straw to animals                                                                         |                                        |                         |                          |                   |          |
| Yes (n = 258)                                                                                         |                                        | No (n = 67)             |                          | <i>p</i>          |          |
| 4.43 ± 0.02                                                                                           |                                        | 4.40 ± 0.03             |                          | 0.41              |          |
| Provision of silage to adult animals                                                                  |                                        |                         |                          |                   |          |
| Yes (n = 72)                                                                                          |                                        | No (n = 253)            |                          | <i>p</i>          |          |
| 4.47 ± 0.02                                                                                           |                                        | 4.41 ± 0.02             |                          | 0.13              |          |
| Provision of finished feed (concentrate) to adult animals                                             |                                        |                         |                          |                   |          |
| Yes (n = 321)                                                                                         |                                        | No (n = 4)              |                          | <i>p</i>          |          |
| 4.43 ± 0.01                                                                                           |                                        | 4.45 ± 0.16             |                          | 0.83              |          |
| Provision of finished feed (concentrate) to adult animals throughout the year                         |                                        |                         |                          |                   |          |
| Yes (n = 219)                                                                                         |                                        | No (n = 106)            |                          | <i>p</i>          |          |
| 4.45 ± 0.02                                                                                           |                                        | 4.37 ± 0.03             |                          | 0.005             |          |
| Type of finished feed (concentrate) to adult animals                                                  |                                        |                         |                          |                   |          |
| Mash (n = 122)                                                                                        | Pelleted (n = 101)                     | Flakes (n = 4)          | Crumbled (n = 87)        | Other (n = 7)     | <i>p</i> |
| 4.45 ± 0.02                                                                                           | 4.40 ± 0.03                            | 4.36 ± 0.10             | 4.43 ± 0.02              | 4.35 ± 0.09       | 0.61     |
| Average quantity of finished feed (concentrate) provided daily to animals during the preceding season |                                        |                         |                          |                   |          |
| ≤ 0.6 kg (n = 140)                                                                                    |                                        | 0.61 – 1.2 kg (n = 148) |                          | > 1.2 kg (n = 37) | <i>p</i> |
| 4.40 ± 0.02                                                                                           |                                        | 4.43 ± 0.02             |                          | 4.48 ± 0.05       | 0.24     |
| Age of farmer                                                                                         |                                        |                         |                          |                   |          |
| Up to 50 years (n = 197)                                                                              |                                        | Over 50 years (n = 128) |                          | <i>p</i>          |          |
| 4.44 ± 0.02                                                                                           |                                        | 4.41 ± 0.02             |                          | 0.39              |          |
| Length of previous animal farming experience                                                          |                                        |                         |                          |                   |          |
| ≤ 5 years (n = 74)                                                                                    |                                        | > 5 years (n = 251)     |                          | <i>p</i>          |          |
| 4.45 ± 0.03                                                                                           |                                        | 4.42 ± 0.02             |                          | 0.28              |          |
| General education of farmer                                                                           |                                        |                         |                          |                   |          |
| Primary (n = 57)                                                                                      | Secondary and post-secondary (n = 225) |                         | Tertiary (n = 43)        | <i>p</i>          |          |
| 4.52 ± 0.03                                                                                           | 4.40 ± 0.02                            |                         | 4.44 ± 0.05              | 0.004             |          |

| Farmer by profession                  |              |          |
|---------------------------------------|--------------|----------|
| Yes (n = 292)                         | No (n = 33)  | <i>p</i> |
| 4.43 ± 0.01                           | 4.38 ± 0.08  | 0.29     |
| Family tradition in farming           |              |          |
| Yes (n = 283)                         | No (n = 42)  | <i>p</i> |
| 4.42 ± 0.02                           | 4.49 ± 0.04  | 0.09     |
| Presence of working staff in the farm |              |          |
| Yes (n = 123)                         | No (n = 202) | <i>p</i> |
| 4.45 ± 0.02                           | 4.41 ± 0.02  | 0.21     |

**Table S6.** Effects of husbandry- and human resources-related factors ( $n = 43$ ) in the fat content (%) in the bulk-tank raw milk of 119 goat herds in Greece.

| Management system applied in the farm                 |                                   |                                |                     |          |
|-------------------------------------------------------|-----------------------------------|--------------------------------|---------------------|----------|
| Intensive (n = 9)                                     | Semi-intensive (n = 29)           | Semi-extensive (n = 61)        | Extensive (n = 20)  | <i>p</i> |
| 4.53 ± 0.43                                           | 4.66 ± 0.21                       | 4.69 ± 0.13                    | 5.27 ± 0.38         | 0.24     |
| Month into the lactation period at sampling           |                                   |                                |                     |          |
| 0 – 1st (n = 8)                                       | 2nd – 5th (n = 60)                | 6th – 9th (n = 43)             | After 9th (n = 8)   | <i>p</i> |
| 5.41 ± 0.55                                           | 4.93 ± 0.16                       | 4.58 ± 0.15                    | 3.94 ± 0.47         | 0.05     |
| Availability of straw bedding                         |                                   |                                |                     |          |
| Yes (n = 76)                                          | No (n = 43)                       |                                |                     | <i>p</i> |
| 4.66 ± 0.14                                           | 4.96 ± 0.19                       |                                |                     | 0.20     |
| Availability of mechanical ventilators                |                                   |                                |                     |          |
| Yes (n = 8)                                           | No (n = 111)                      |                                |                     | <i>p</i> |
| 4.76 ± 0.51                                           | 4.77 ± 0.11                       |                                |                     | 0.98     |
| Grazing practiced                                     |                                   |                                |                     |          |
| Yes (n = 113)                                         | No (n = 6)                        |                                |                     | <i>p</i> |
| 4.79 ± 0.11                                           | 4.47 ± 0.60                       |                                |                     | 0.54     |
| Grazing land available to animals                     |                                   |                                |                     |          |
| ≤ 0.50 ac. per animal (n = 17)                        | 0.51-2.00 ac. per animal (n = 31) | > 2.00 ac. per animal (n = 71) |                     | <i>p</i> |
| 4.51 ± 0.29                                           | 5.11 ± 0.23                       | 4.68 ± 0.14                    |                     | 0.17     |
| Availability of milking parlour                       |                                   |                                |                     |          |
| Yes (n = 66)                                          | No (n = 53)                       |                                |                     | <i>p</i> |
| 4.52 ± 0.13                                           | 4.08 ± 0.19                       |                                |                     | 0.012    |
| Number of milking units in the parlour                |                                   |                                |                     |          |
| < 24 (n = 37)                                         | 24 (n = 26)                       | > 24 (n = 3)                   |                     | <i>p</i> |
| 4.51 ± 0.17                                           | 4.57 ± 0.22                       | 4.26 ± 0.44                    |                     | 0.88     |
| Number of available milking units per animal position |                                   |                                |                     |          |
| < 1 (n = 42)                                          | 1 (n = 24)                        |                                |                     | <i>p</i> |
| 4.54 ± 0.17                                           | 4.49 ± 0.19                       |                                |                     | 0.85     |
| System pressure                                       |                                   |                                |                     |          |
| < 38 kPa (n = 5)                                      | 38 - 42 kPa (n = 55)              | > 42 kPa (n = 6)               |                     | <i>p</i> |
| 4.76 ± 0.45                                           | 4.40 ± 0.14                       | 5.49 ± 0.27                    |                     | 0.040    |
| Type of flow line                                     |                                   |                                |                     |          |
| High (n = 43)                                         | Low (n = 16)                      | Other (n = 7)                  |                     | <i>p</i> |
| 4.38 ± 0.13                                           | 4.59 ± 0.30                       | 5.27 ± 0.57                    |                     | 0.11     |
| No. of does in the herd                               |                                   |                                |                     |          |
| ≤ 165 does (n = 56)                                   | 166-330 does (n = 37)             | 331-500 does (n = 13)          | > 500 does (n = 13) | <i>p</i> |
| 4.63 ± 0.15                                           | 5.06 ± 0.23                       | 4.43 ± 0.30                    | 4.85 ± 0.31         | 0.27     |
| Breed of does                                         |                                   |                                |                     |          |
| Alpine (n = 9)                                        | Crossbreeds (n = 18)              | Damascus (n = 18)              | Kefallinia (n = 1)  | <i>p</i> |
| 3.90 ± 0.30                                           | 4.54 ± 0.35                       | 4.76 ± 0.17                    | 5.72                | 0.15     |
| Local ( <i>Capra prisca</i> ) (n = 50)                | Murcia (n = 13)                   | Saanen (n = 5)                 | Skopelos (n = 5)    |          |
| 4.90 ± 0.18                                           | 5.08 ± 0.30                       | 4.40 ± 0.59                    | 5.24 ± 0.72         |          |

| Average age of culling does                                              |                       |                    |          |
|--------------------------------------------------------------------------|-----------------------|--------------------|----------|
| ≤ 6 years (n = 45)                                                       | > 6 years (n = 74)    |                    | <i>p</i> |
| 4.68 ± 0.17                                                              | 4.83 ± 0.15           |                    | 0.52     |
| Total milk quantity per doe obtained during the preceding milking period |                       |                    |          |
| ≤ 200 L (n = 73)                                                         | 201 - 400 L (n = 32)  | > 400 L (n = 14)   | <i>p</i> |
| 4.89 ± 0.15                                                              | 4.58 ± 0.17           | 4.53 ± 0.34        | 0.37     |
| Average number of kids born per doe                                      |                       |                    |          |
| ≤ 1.50 (n = 102)                                                         | > 1.50 (n = 17)       |                    | <i>p</i> |
| 4.82 ± 0.12                                                              | 4.44 ± 0.23           |                    | 0.22     |
| Collaboration with a veterinarian                                        |                       |                    |          |
| Yes (n = 101)                                                            | No (n = 18)           |                    | <i>p</i> |
| 4.84 ± 0.12                                                              | 4.37 ± 0.24           |                    | 0.13     |
| Clinical mastitis annual incidence risk in the herd                      |                       |                    |          |
| ≤ 0.50% (n = 48)                                                         | > 0.50% (n = 71)      |                    | <i>p</i> |
| 4.71 ± 0.19                                                              | 4.81 ± 0.14           |                    | 0.69     |
| Application of reproductive control practices in the farm                |                       |                    |          |
| Yes (n = 17)                                                             | No (n = 102)          |                    | <i>p</i> |
| 4.83 ± 0.26                                                              | 4.76 ± 0.12           |                    | 0.83     |
| Nutritional modifications performed according to the reproductive stage  |                       |                    |          |
| Yes (n = 68)                                                             | No (n = 51)           |                    | <i>p</i> |
| 4.62 ± 0.14                                                              | 4.97 ± 0.18           |                    | 0.11     |
| Method for drying-off at the end of the lactation period                 |                       |                    |          |
| Abrupt (n = 5)                                                           | Progressive (n = 114) |                    | <i>p</i> |
| 4.13 ± 0.55                                                              | 4.80 ± 0.11           |                    | 0.23     |
| Age of kid removal from their dams                                       |                       |                    |          |
| < 45 days (n = 26)                                                       | 45 – 60 days (n = 44) | > 60 days (n = 49) | <i>p</i> |
| 4.43 ± 0.24                                                              | 4.59 ± 0.17           | 5.11 ± 0.18        | 0.032    |
| Daily number of milking sessions                                         |                       |                    |          |
| One (n = 4)                                                              | Two (n = 108)         | Three (n = 7)      | <i>p</i> |
| 4.12 ± 0.69                                                              | 4.78 ± 0.12           | 5.01 ± 0.33        | 0.50     |
| Number of feet care sessions provided to the does annually               |                       |                    |          |
| No feet care provided (n = 48)                                           | 1 - 2 (n = 69)        | > 2 (n = 2)        | <i>p</i> |
| 4.91 ± 0.19                                                              | 4.68 ± 0.14           | 4.47 ± 0.91        | 0.58     |
| Shearing of animals                                                      |                       |                    |          |
| Yes (n = 102)                                                            | No (n = 17)           |                    | <i>p</i> |
| 4.75 ± 0.12                                                              | 4.86 ± 0.29           |                    | 0.75     |
| Vaccination against mastitis                                             |                       |                    |          |
| Yes (n = 35)                                                             | No (n = 84)           |                    | <i>p</i> |
| 4.69 ± 0.17                                                              | 4.80 ± 0.14           |                    | 0.65     |
| Vaccination against contagious agalactia                                 |                       |                    |          |
| Yes (n = 65)                                                             | No (n = 54)           |                    | <i>p</i> |
| 4.78 ± 0.16                                                              | 4.75 ± 0.16           |                    | 0.89     |

| Administration of anthelmintic treatment during the last stage of pregnancy                           |                                       |                        |                         |                   |          |
|-------------------------------------------------------------------------------------------------------|---------------------------------------|------------------------|-------------------------|-------------------|----------|
| Yes (n = 75)                                                                                          |                                       | No (n = 44)            |                         | <i>p</i>          |          |
| 4.88 ± 0.15                                                                                           |                                       | 4.58 ± 0.16            |                         | 0.19              |          |
| Duration of grazing during the year                                                                   |                                       |                        |                         |                   |          |
| No grazing (n = 8)                                                                                    | 1 - 5 months (n = 13)                 | 6 - 10 months (n = 33) | 11 - 12 months (n = 65) | <i>p</i>          |          |
| 4.51 ± 0.44                                                                                           | 4.58 ± 0.39                           | 4.58 ± 0.20            | 4.94 ± 0.15             | 0.44              |          |
| Provision of hay as fodder to animals                                                                 |                                       |                        |                         |                   |          |
| Yes (n = 116)                                                                                         |                                       | No (n = 3)             |                         | <i>p</i>          |          |
| 4.77 ± 0.11                                                                                           |                                       | 4.87 ± 0.37            |                         | 0.89              |          |
| Average quantity of hay provided daily to animals during the preceding season                         |                                       |                        |                         |                   |          |
| ≤ 0.6 kg (n = 59)                                                                                     |                                       | > 0.6 kg (n = 60)      |                         | <i>p</i>          |          |
| 4.97 ± 0.17                                                                                           |                                       | 4.58 ± 0.14            |                         | 0.08              |          |
| Provision of straw to animals                                                                         |                                       |                        |                         |                   |          |
| Yes (n = 73)                                                                                          |                                       | No (n = 46)            |                         | <i>p</i>          |          |
| 4.65 ± 0.13                                                                                           |                                       | 4.95 ± 0.21            |                         | 0.20              |          |
| Provision of silage to adult animals                                                                  |                                       |                        |                         |                   |          |
| Yes (n = 18)                                                                                          |                                       | No (n = 101)           |                         | <i>p</i>          |          |
| 4.59 ± 0.23                                                                                           |                                       | 4.80 ± 0.12            |                         | 0.50              |          |
| Provision of finished feed (concentrate) to adult animals                                             |                                       |                        |                         |                   |          |
| Yes (n = 116)                                                                                         |                                       | No (n = 3)             |                         | <i>p</i>          |          |
| 4.76 ± 0.11                                                                                           |                                       | 5.30 ± 0.09            |                         | 0.45              |          |
| Provision of finished feed (concentrate) to adult animals throughout the year                         |                                       |                        |                         |                   |          |
| Yes (n = 70)                                                                                          |                                       | No (n = 49)            |                         | <i>p</i>          |          |
| 4.54 ± 0.13                                                                                           |                                       | 5.05 ± 0.20            |                         | 0.020             |          |
| Type of finished feed (concentrate) to adult animals                                                  |                                       |                        |                         |                   |          |
| Mash (n = 43)                                                                                         | Pelleted (n = 34)                     | Flakes (n = 0)         | Crumbled (n = 34)       | Other (n = 5)     | <i>p</i> |
| 4.78 ± 0.19                                                                                           | 4.71 ± 0.19                           | -                      | 4.89 ± 0.23             | 4.48 ± 0.46       | 0.84     |
| Average quantity of finished feed (concentrate) provided daily to animals during the preceding season |                                       |                        |                         |                   |          |
| ≤ 0.6 kg (n = 48)                                                                                     |                                       | 0.61 – 1.2 kg (n = 35) |                         | > 1.2 kg (n = 36) |          |
| 4.87 ± 0.20                                                                                           |                                       | 4.73 ± 0.19            |                         | 4.68 ± 0.19       |          |
|                                                                                                       |                                       |                        |                         | 0.75              |          |
| Age of farmer                                                                                         |                                       |                        |                         |                   |          |
| Up to 50 years (n = 73)                                                                               |                                       | Over 50 years (n = 46) |                         | <i>p</i>          |          |
| 4.73 ± 0.15                                                                                           |                                       | 4.83 ± 0.17            |                         | 0.67              |          |
| Length of previous animal farming experience                                                          |                                       |                        |                         |                   |          |
| ≤ 5 years (n = 24)                                                                                    |                                       | > 5 years (n = 95)     |                         | <i>p</i>          |          |
| 4.75 ± 0.26                                                                                           |                                       | 4.77 ± 0.12            |                         | 0.94              |          |
| General education of farmer                                                                           |                                       |                        |                         |                   |          |
| Primary (n = 20)                                                                                      | Secondary and post-secondary (n = 89) |                        | Tertiary (n = 10)       |                   | <i>p</i> |
| 5.26 ± 0.32                                                                                           | 4.72 ± 0.12                           |                        | 4.24 ± 0.34             |                   | 0.07     |
| Farmer by profession                                                                                  |                                       |                        |                         |                   |          |
| Yes (n = 105)                                                                                         |                                       | No (n = 14)            |                         | <i>p</i>          |          |
| 4.82 ± 0.12                                                                                           |                                       | 4.42 ± 0.25            |                         | 0.25              |          |

| Family tradition in farming           |               |             |          |
|---------------------------------------|---------------|-------------|----------|
|                                       | Yes (n = 104) | No (n = 15) | <i>p</i> |
|                                       | 4.73 ± 0.12   | 5.02 ± 0.32 | 0.40     |
| Presence of working staff in the farm |               |             |          |
|                                       | Yes (n = 34)  | No (n = 85) | <i>p</i> |
|                                       | 4.60 ± 0.20   | 4.84 ± 0.14 | 0.35     |

**Table S7.** Effects of husbandry- and human resources-related factors (n = 43) in the protein content (%) in the bulk-tank raw milk of 119 goat herds in Greece.

| Management system applied in the farm                 |                                   |                                |                     |          |
|-------------------------------------------------------|-----------------------------------|--------------------------------|---------------------|----------|
| Intensive (n = 9)                                     | Semi-intensive (n = 29)           | Semi-extensive (n = 61)        | Extensive (n = 20)  | <i>p</i> |
| 3.29 ± 0.10                                           | 3.19 ± 0.05                       | 3.25 ± 0.05                    | 3.18 ± 0.05         | 0.70     |
| Month into the lactation period at sampling           |                                   |                                |                     |          |
| 0 – 1st (n = 8)                                       | 2nd – 5th (n = 60)                | 6th – 9th (n = 43)             | After 9th (n = 8)   | <i>p</i> |
| 3.39 ± 0.05                                           | 3.28 ± 0.04                       | 3.13 ± 0.04                    | 3.17 ± 0.07         | 0.030    |
| Availability of straw bedding                         |                                   |                                |                     |          |
| Yes (n = 76)                                          | No (n = 43)                       |                                |                     | <i>p</i> |
| 3.23 ± 0.04                                           | 3.23 ± 0.05                       |                                |                     | 0.99     |
| Availability of mechanical ventilators                |                                   |                                |                     |          |
| Yes (n = 8)                                           | No (n = 111)                      |                                |                     | <i>p</i> |
| 3.33 ± 0.11                                           | 3.22 ± 0.03                       |                                |                     | 0.33     |
| Grazing practiced                                     |                                   |                                |                     |          |
| Yes (n = 113)                                         | No (n = 6)                        |                                |                     | <i>p</i> |
| 3.23 ± 0.03                                           | 3.22 ± 0.08                       |                                |                     | 0.92     |
| Grazing land available to animals                     |                                   |                                |                     |          |
| ≤ 0.50 ac. per animal (n = 17)                        | 0.51-2.00 ac. per animal (n = 31) | > 2.00 ac. per animal (n = 71) |                     | <i>p</i> |
| 3.20 ± 0.05                                           | 3.22 ± 0.04                       | 3.24 ± 0.04                    |                     | 0.88     |
| Availability of milking parlour                       |                                   |                                |                     |          |
| Yes (n = 66)                                          | No (n = 53)                       |                                |                     | <i>p</i> |
| 3.22 ± 0.04                                           | 3.24 ± 0.04                       |                                |                     | 0.78     |
| Number of milking units in the parlour                |                                   |                                |                     |          |
| < 24 (n = 37)                                         | 24 (n = 26)                       | > 24 (n = 3)                   |                     | <i>p</i> |
| 3.21 ± 0.05                                           | 3.25 ± 0.08                       | 3.16 ± 0.20                    |                     | 0.85     |
| Number of available milking units per animal position |                                   |                                |                     |          |
| < 1 (n = 42)                                          | 1 (n = 24)                        |                                |                     | <i>p</i> |
| 3.23 ± 0.05                                           | 3.20 ± 0.08                       |                                |                     | 0.70     |
| System pressure                                       |                                   |                                |                     |          |
| < 38 kPa (n = 5)                                      | 38 - 42 kPa (n = 55)              | > 42 kPa (n = 6)               |                     | <i>p</i> |
| 3.27 ± 0.15                                           | 3.20 ± 0.05                       | 3.34 ± 0.14                    |                     | 0.61     |
| Type of flow line                                     |                                   |                                |                     |          |
| High (n = 43)                                         | Low (n = 16)                      | Other (n = 7)                  |                     | <i>p</i> |
| 3.18 ± 0.05                                           | 3.20 ± 0.06                       | 3.49 ± 0.12                    |                     | 0.07     |
| No. of does in the herd                               |                                   |                                |                     |          |
| ≤ 165 does (n = 56)                                   | 166-330 does (n = 37)             | 331-500 does (n = 13)          | > 500 does (n = 13) | <i>p</i> |
| 3.28 ± 0.05                                           | 3.19 ± 0.03                       | 3.14 ± 0.05                    | 3.19 ± 0.06         | 0.33     |
| Breed of does                                         |                                   |                                |                     |          |
| Alpine (n = 9)                                        | Crossbreeds (n = 18)              | Damascus (n = 18)              | Kefallinia (n = 1)  | <i>p</i> |
| 3.08 ± 0.10                                           | 3.38 ± 0.08                       | 3.14 ± 0.04                    | 3.08                | 0.15     |
| Local ( <i>Capra prisca</i> ) (n = 50)                | Murcia (n = 13)                   | Saanen (n = 5)                 | Skopelos (n = 5)    |          |
| 3.17 ± 0.03                                           | 3.37 ± 0.13                       | 3.42 ± 0.25                    | 3.32 ± 0.10         |          |

| Average age of culling does                                              |                       |                    |          |
|--------------------------------------------------------------------------|-----------------------|--------------------|----------|
| ≤ 6 years (n = 45)                                                       | > 6 years (n = 74)    |                    | <i>p</i> |
| 3.21 ± 0.04                                                              | 3.24 ± 0.04           |                    | 0.70     |
| Total milk quantity per doe obtained during the preceding milking period |                       |                    |          |
| ≤ 200 L (n = 73)                                                         | 201 - 400 L (n = 32)  | > 400 L (n = 14)   | <i>p</i> |
| 3.22 ± 0.03                                                              | 3.23 ± 0.06           | 3.31 ± 0.13        | 0.70     |
| Average number of kids born per doe                                      |                       |                    |          |
| ≤ 1.50 (n = 102)                                                         | > 1.50 (n = 17)       |                    | <i>p</i> |
| 3.23 ± 0.03                                                              | 3.23 ± 0.10           |                    | 0.98     |
| Collaboration with a veterinarian                                        |                       |                    |          |
| Yes (n = 101)                                                            | No (n = 18)           |                    | <i>p</i> |
| 3.22 ± 0.03                                                              | 3.30 ± 0.11           |                    | 0.29     |
| Clinical mastitis annual incidence risk in the herd                      |                       |                    |          |
| ≤ 0.50% (n = 48)                                                         | > 0.50% (n = 71)      |                    | <i>p</i> |
| 3.21 ± 0.05                                                              | 3.24 ± 0.04           |                    | 0.66     |
| Application of reproductive control practices in the farm                |                       |                    |          |
| Yes (n = 17)                                                             | No (n = 102)          |                    | <i>p</i> |
| 3.24 ± 0.10                                                              | 3.23 ± 0.03           |                    | 0.91     |
| Nutritional modifications performed according to the reproductive stage  |                       |                    |          |
| Yes (n = 68)                                                             | No (n = 51)           |                    | <i>p</i> |
| 3.22 ± 0.03                                                              | 3.24 ± 0.05           |                    | 0.65     |
| Method for drying-off at the end of the lactation period                 |                       |                    |          |
| Abrupt (n = 5)                                                           | Progressive (n = 114) |                    | <i>p</i> |
| 3.16 ± 0.08                                                              | 3.23 ± 0.03           |                    | 0.60     |
| Age of kid removal from their dams                                       |                       |                    |          |
| < 45 days (n = 26)                                                       | 45 – 60 days (n = 44) | > 60 days (n = 49) | <i>p</i> |
| 3.24 ± 0.06                                                              | 3.23 ± 0.05           | 3.22 ± 0.04        | 0.97     |
| Daily number of milking sessions                                         |                       |                    |          |
| One (n = 4)                                                              | Two (n = 108)         | Three (n = 7)      | <i>p</i> |
| 3.27 ± 0.12                                                              | 3.23 ± 0.03           | 3.14 ± 0.08        | 0.72     |
| Number of feet care sessions provided to the does annually               |                       |                    |          |
| No feet care provided (n = 48)                                           | 1 - 2 (n = 69)        | > 2 (n = 2)        | <i>p</i> |
| 3.22 ± 0.04                                                              | 3.23 ± 0.04           | 3.24 ± 0.19        | 0.99     |
| Shearing of animals                                                      |                       |                    |          |
| Yes (n = 102)                                                            | No (n = 17)           |                    | <i>p</i> |
| 3.24 ± 0.03                                                              | 3.18 ± 0.05           |                    | 0.47     |
| Vaccination against mastitis                                             |                       |                    |          |
| Yes (n = 35)                                                             | No (n = 84)           |                    | <i>p</i> |
| 3.18 ± 0.06                                                              | 3.25 ± 0.03           |                    | 0.30     |
| Vaccination against contagious agalactia                                 |                       |                    |          |
| Yes (n = 65)                                                             | No (n = 54)           |                    | <i>p</i> |
| 3.24 ± 0.04                                                              | 3.21 ± 0.04           |                    | 0.63     |

| Administration of anthelmintic treatment during the last stage of pregnancy                           |                                       |                        |                         |                   |          |
|-------------------------------------------------------------------------------------------------------|---------------------------------------|------------------------|-------------------------|-------------------|----------|
| Yes (n = 75)                                                                                          |                                       | No (n = 44)            |                         | <i>p</i>          |          |
| 3.23 ± 0.03                                                                                           |                                       | 3.22 ± 0.05            |                         | 0.91              |          |
| Duration of grazing during the year                                                                   |                                       |                        |                         |                   |          |
| No grazing (n = 8)                                                                                    | 1 - 5 months (n = 13)                 | 6 - 10 months (n = 33) | 11 - 12 months (n = 65) | <i>p</i>          |          |
| 3.27 ± 0.07                                                                                           | 3.48 ± 0.12                           | 3.21 ± 0.06            | 3.18 ± 0.03             | 0.014             |          |
| Provision of hay as fodder to animals                                                                 |                                       |                        |                         |                   |          |
| Yes (n = 116)                                                                                         |                                       | No (n = 3)             |                         | <i>p</i>          |          |
| 3.23 ± 0.03                                                                                           |                                       | 2.99 ± 0.02            |                         | 0.18              |          |
| Average quantity of hay provided daily to animals during the preceding season                         |                                       |                        |                         |                   |          |
| ≤ 0.6 kg (n = 59)                                                                                     |                                       | > 0.6 kg (n = 60)      |                         | <i>p</i>          |          |
| 3.19 ± 0.03                                                                                           |                                       | 3.26 ± 0.05            |                         | 0.20              |          |
| Provision of straw to animals                                                                         |                                       |                        |                         |                   |          |
| Yes (n = 73)                                                                                          |                                       | No (n = 46)            |                         | <i>p</i>          |          |
| 3.22 ± 0.04                                                                                           |                                       | 3.24 ± 0.05            |                         | 0.77              |          |
| Provision of silage to adult animals                                                                  |                                       |                        |                         |                   |          |
| Yes (n = 18)                                                                                          |                                       | No (n = 101)           |                         | <i>p</i>          |          |
| 3.34 ± 0.07                                                                                           |                                       | 3.21 ± 0.03            |                         | 0.09              |          |
| Provision of finished feed (concentrate) to adult animals                                             |                                       |                        |                         |                   |          |
| Yes (n = 116)                                                                                         |                                       | No (n = 3)             |                         | <i>p</i>          |          |
| 3.23 ± 0.03                                                                                           |                                       | 3.14 ± 0.21            |                         | 0.61              |          |
| Provision of finished feed (concentrate) to adult animals throughout the year                         |                                       |                        |                         |                   |          |
| Yes (n = 70)                                                                                          |                                       | No (n = 49)            |                         | <i>p</i>          |          |
| 3.21 ± 0.03                                                                                           |                                       | 3.25 ± 0.05            |                         | 0.43              |          |
| Type of finished feed (concentrate) to adult animals                                                  |                                       |                        |                         |                   |          |
| Mash (n = 43)                                                                                         | Pelleted (n = 34)                     | Flakes (n = 0)         | Crumbled (n = 34)       | Other (n = 5)     | <i>p</i> |
| 3.26 ± 0.04                                                                                           | 3.21 ± 0.05                           | -                      | 3.23 ± 0.06             | 3.14 ± 0.08       | 0.73     |
| Average quantity of finished feed (concentrate) provided daily to animals during the preceding season |                                       |                        |                         |                   |          |
| ≤ 0.6 kg (n = 48)                                                                                     |                                       | 0.61 – 1.2 kg (n = 35) |                         | > 1.2 kg (n = 36) |          |
| 3.20 ± 0.04                                                                                           |                                       | 3.25 ± 0.06            |                         | 3.25 ± 0.05       |          |
|                                                                                                       |                                       |                        |                         | <i>p</i>          |          |
|                                                                                                       |                                       |                        |                         | 0.67              |          |
| Age of farmer                                                                                         |                                       |                        |                         |                   |          |
| Up to 50 years (n = 73)                                                                               |                                       | Over 50 years (n = 46) |                         | <i>p</i>          |          |
| 3.23 ± 0.04                                                                                           |                                       | 3.22 ± 0.04            |                         | 0.91              |          |
| Length of previous animal farming experience                                                          |                                       |                        |                         |                   |          |
| ≤ 5 years (n = 24)                                                                                    |                                       | > 5 years (n = 95)     |                         | <i>p</i>          |          |
| 3.22 ± 0.05                                                                                           |                                       | 3.23 ± 0.03            |                         | 0.82              |          |
| General education of farmer                                                                           |                                       |                        |                         |                   |          |
| Primary (n = 20)                                                                                      | Secondary and post-secondary (n = 89) |                        | Tertiary (n = 10)       |                   | <i>p</i> |
| 3.26 ± 0.05                                                                                           | 3.22 ± 0.03                           |                        | 3.24 ± 0.10             |                   | 0.84     |
| Farmer by profession                                                                                  |                                       |                        |                         |                   |          |
| Yes (n = 105)                                                                                         |                                       | No (n = 14)            |                         | <i>p</i>          |          |
| 3.23 ± 0.03                                                                                           |                                       | 3.23 ± 0.09            |                         | 0.99              |          |

| Family tradition in farming           |               |             |          |
|---------------------------------------|---------------|-------------|----------|
|                                       | Yes (n = 104) | No (n = 15) | <i>p</i> |
|                                       | 3.23 ± 0.03   | 3.23 ± 0.06 | 0.94     |
| Presence of working staff in the farm |               |             |          |
|                                       | Yes (n = 34)  | No (n = 85) | <i>p</i> |
|                                       | 3.27 ± 0.06   | 3.21 ± 0.03 | 0.37     |

**Table S8.** Results of univariable analysis of variables ( $n = 32$ ) for evaluation of the outcome “fat and protein content in bulk-tank milk concurrently above the average contents found for all flocks” in 325 sheep flocks in Greece.

| Flocks with fat or protein content in bulk-tank milk concurrently below the average content found for all flocks |                          |                          |                    | Flocks with fat and protein content in bulk-tank milk concurrently above the average contents found for all flocks |                          |                          |                    |          |
|------------------------------------------------------------------------------------------------------------------|--------------------------|--------------------------|--------------------|--------------------------------------------------------------------------------------------------------------------|--------------------------|--------------------------|--------------------|----------|
| Average somatic cell counts in bulk-tank raw milk                                                                |                          |                          |                    |                                                                                                                    |                          |                          |                    | <i>p</i> |
| 0.511 × 10 <sup>6</sup> cells mL <sup>-1</sup>                                                                   |                          |                          |                    | 0.411 × 10 <sup>6</sup> cells mL <sup>-1</sup>                                                                     |                          |                          |                    | 0.020    |
| Average total bacterial counts in bulk-tank raw milk                                                             |                          |                          |                    |                                                                                                                    |                          |                          |                    | <i>p</i> |
| 418 × 10 <sup>3</sup> cfu mL <sup>-1</sup>                                                                       |                          |                          |                    | 341 × 10 <sup>3</sup> cells mL <sup>-1</sup>                                                                       |                          |                          |                    | 0.34     |
| Staphylococcal recovery from bulk-tank raw milk                                                                  |                          |                          |                    |                                                                                                                    |                          |                          |                    | <i>p</i> |
| No staphylococcal isolation                                                                                      |                          | Staphylococcal isolation |                    | No staphylococcal isolation                                                                                        |                          | Staphylococcal isolation |                    | 0.45     |
| 88                                                                                                               |                          | 158                      |                    | 32                                                                                                                 |                          | 47                       |                    |          |
| epg counts in pooled faecal samples                                                                              |                          |                          |                    |                                                                                                                    |                          |                          |                    | <i>p</i> |
| ≤ 300 epg                                                                                                        |                          | ≥ 350 epg                |                    | ≤ 300 epg                                                                                                          |                          | ≥ 350 epg                |                    | 0.05     |
| 190                                                                                                              |                          | 56                       |                    | 69                                                                                                                 |                          | 10                       |                    |          |
| Proportion of <i>Teladorsagia</i> in pooled faecal samples                                                       |                          |                          |                    |                                                                                                                    |                          |                          |                    | <i>P</i> |
| 0%                                                                                                               |                          | 1%-63%                   |                    | ≥ 64%                                                                                                              |                          | 0%                       |                    | 0.77     |
| 37                                                                                                               |                          | 137                      |                    | 72                                                                                                                 |                          | 10                       |                    |          |
| Management system applied in farms                                                                               |                          |                          |                    |                                                                                                                    |                          |                          |                    | <i>p</i> |
| Intensive (n = 43)                                                                                               | Semi-intensive (n = 151) | Semi-extensive (n = 107) | Extensive (n = 24) | Intensive (n = 43)                                                                                                 | Semi-intensive (n = 151) | Semi-extensive (n = 107) | Extensive (n = 24) |          |
| 33                                                                                                               | 106                      | 87                       | 20                 | 10                                                                                                                 | 45                       | 20                       | 4                  | 0.16     |
| Month into the lactation period at sampling                                                                      |                          |                          |                    |                                                                                                                    |                          |                          |                    | <i>p</i> |
| 0 – 1st (n = 23)                                                                                                 | 2nd – 5th (n = 138)      | 6th – 9th (n = 147)      | After 9th (n = 17) | 0 – 1st (n = 23)                                                                                                   | 2nd – 5th (n = 138)      | 6th – 9th (n = 147)      | After 9th (n = 17) | 0.012    |
| 21                                                                                                               | 93                       | 117                      | 15                 | 2                                                                                                                  | 45                       | 30                       | 2                  |          |
| Availability of straw bedding                                                                                    |                          |                          |                    |                                                                                                                    |                          |                          |                    | <i>p</i> |
| Yes (n = 268)                                                                                                    |                          | No (n = 57)              |                    | Yes (n = 268)                                                                                                      |                          | No (n = 57)              |                    | 0.53     |
| 201                                                                                                              |                          | 45                       |                    | 67                                                                                                                 |                          | 12                       |                    |          |
| Grazing practiced                                                                                                |                          |                          |                    |                                                                                                                    |                          |                          |                    | <i>p</i> |
| Yes (n = 281)                                                                                                    |                          | No (n = 44)              |                    | Yes (n = 281)                                                                                                      |                          | No (n = 44)              |                    | 0.52     |
| 211                                                                                                              |                          | 35                       |                    | 70                                                                                                                 |                          | 5                        |                    |          |
| Grazing land available to animals                                                                                |                          |                          |                    |                                                                                                                    |                          |                          |                    |          |

|                                                                         |  |                                       |  |                                |  |                                 |  |                                       |  |                                   |  |                               |  |                           |  |                  |
|-------------------------------------------------------------------------|--|---------------------------------------|--|--------------------------------|--|---------------------------------|--|---------------------------------------|--|-----------------------------------|--|-------------------------------|--|---------------------------|--|------------------|
| ≤ 0.50 ac. per animal (n = 118)                                         |  | 0.51-2.00 ac. per animal<br>(n = 130) |  | > 2.00 ac. per animal (n = 77) |  | ≤ 0.50 ac. per animal (n = 118) |  | 0.51-2.00 ac. per animal<br>(n = 130) |  | > 2.00 ac. per animal (n = 77)    |  | <i>P</i>                      |  |                           |  |                  |
| 91                                                                      |  | 97                                    |  | 58                             |  | 27                              |  | 33                                    |  | 19                                |  | 0.90                          |  |                           |  |                  |
| Availability of milking parlour                                         |  |                                       |  |                                |  |                                 |  |                                       |  |                                   |  |                               |  |                           |  |                  |
| Yes (n = 255)<br>195                                                    |  |                                       |  | No (n = 70)<br>51              |  | Yes (n = 255)<br>60             |  |                                       |  | No (n = 70)<br>19                 |  | <i>p</i><br>0.53              |  |                           |  |                  |
| Number of available milking units per animal position                   |  |                                       |  |                                |  |                                 |  |                                       |  |                                   |  |                               |  |                           |  |                  |
| < 1 (n = 177)<br>134                                                    |  |                                       |  | 1 (n = 78)<br>61               |  | < 1 (n = 177)<br>43             |  |                                       |  | 1 (n = 78)<br>17                  |  | <i>p</i><br>0.66              |  |                           |  |                  |
| System pressure                                                         |  |                                       |  |                                |  |                                 |  |                                       |  |                                   |  |                               |  |                           |  |                  |
| < 38 kPa (n = 22)<br>18                                                 |  | 38 - 42 kPa (n = 203)<br>154          |  | > 42 kPa (n = 30)<br>23        |  | < 38 kPa (n = 22)<br>4          |  | 38 - 42 kPa (n = 203)<br>49           |  | > 42 kPa (n = 30)<br>7            |  | <i>p</i><br>0.82              |  |                           |  |                  |
| Type of flow line                                                       |  |                                       |  |                                |  |                                 |  |                                       |  |                                   |  |                               |  |                           |  |                  |
| High (n = 182)<br>135                                                   |  | Low (n = 55)<br>47                    |  | Other (n = 18)<br>13           |  | High (n = 182)<br>47            |  | Low (n = 55)<br>8                     |  | Other (n = 18)<br>5               |  | <i>p</i><br>0.20              |  |                           |  |                  |
| No. of ewes in the flock                                                |  |                                       |  |                                |  |                                 |  |                                       |  |                                   |  |                               |  |                           |  |                  |
| ≤ 165 ewes (n = 88)<br>65                                               |  | 166 - 330 ewes<br>(n = 120)<br>89     |  | 331 - 500 ewes (n = 66)<br>52  |  | > 500 ewes (n = 51)<br>40       |  | ≤ 165 ewes (n = 88)<br>23             |  | 166 - 330 ewes<br>(n = 120)<br>31 |  | 331 - 500 ewes (n = 66)<br>14 |  | > 500 ewes (n = 51)<br>11 |  | <i>p</i><br>0.83 |
| Breed of ewes                                                           |  |                                       |  |                                |  |                                 |  |                                       |  |                                   |  |                               |  |                           |  |                  |
| Assaf (n = 30)<br>25                                                    |  | Awassi (n = 1)<br>1                   |  | Boutsko (n = 2)<br>1           |  | Chios (n = 44)<br>33            |  | Assaf (n = 30)<br>5                   |  | Awassi (n = 1)<br>0               |  | Boutsko (n = 2)<br>1          |  | Chios (n = 44)<br>11      |  | <i>p</i><br>0.47 |
| Crossbreeds (n = 43)<br>32                                              |  | Friesarta (n = 12)<br>11              |  | Friesian (n = 13)<br>10        |  | Karagouniko (n = 5)<br>4        |  | Crossbreeds (n = 43)<br>11            |  | Friesarta (n = 12)<br>1           |  | Friesian (n = 13)<br>3        |  | Karagouniko (n = 5)<br>1  |  |                  |
| Kefallinia (n = 1)<br>0                                                 |  | Lacaune (n = 95)<br>64                |  | Local (n = 55)<br>44           |  | Mytilini (n = 18)<br>15         |  | Kefallinia (n = 1)<br>1               |  | Lacaune (n = 95)<br>31            |  | Local (n = 55)<br>11          |  | Mytilini (n = 18)<br>3    |  |                  |
| Sfakia (n = 6)<br>5                                                     |  | Sfakia (n = 6)<br>1                   |  |                                |  |                                 |  |                                       |  |                                   |  |                               |  |                           |  |                  |
| Average number of lambs born per ewe                                    |  |                                       |  |                                |  |                                 |  |                                       |  |                                   |  |                               |  |                           |  |                  |
| ≤ 1.50 (n = 280)<br>215                                                 |  |                                       |  | > 1.50 (n = 45)<br>31          |  | ≤ 1.50 (n = 80)<br>65           |  |                                       |  | > 1.50 (n = 45)<br>14             |  | <i>p</i><br>0.25              |  |                           |  |                  |
| Collaboration with a veterinarian                                       |  |                                       |  |                                |  |                                 |  |                                       |  |                                   |  |                               |  |                           |  |                  |
| Yes (n = 277)<br>204                                                    |  |                                       |  | No (n = 48)<br>42              |  | Yes (n = 277)<br>73             |  |                                       |  | No (n = 48)<br>6                  |  | <i>p</i><br>0.039             |  |                           |  |                  |
| Nutritional modifications performed according to the reproductive stage |  |                                       |  |                                |  |                                 |  |                                       |  |                                   |  |                               |  |                           |  |                  |

|                                                                               |                             |                               |                                   |                          |                             |                                          |                                   |                              |                    |                                             |
|-------------------------------------------------------------------------------|-----------------------------|-------------------------------|-----------------------------------|--------------------------|-----------------------------|------------------------------------------|-----------------------------------|------------------------------|--------------------|---------------------------------------------|
| Yes (n = 229)<br>170                                                          |                             |                               | No (n = 96)<br>76                 |                          | Yes (n = 229)<br>59         |                                          |                                   | No (n = 96)<br>20            |                    | <i>p</i><br>0.34                            |
| Age of lamb removal from their dams                                           |                             |                               |                                   |                          |                             |                                          |                                   |                              |                    |                                             |
| < 45 days (n = 119)<br>92                                                     |                             | 45 – 60 days (n = 170)<br>125 |                                   | > 60 days (n = 36)<br>29 |                             | < 45 days (n = 119)<br>27                |                                   | 45 – 60 days (n = 170)<br>45 |                    | > 60 days (n = 36)<br>7<br><i>p</i><br>0.59 |
| Daily number of milking sessions                                              |                             |                               |                                   |                          |                             |                                          |                                   |                              |                    |                                             |
| One (n = 1)<br>0                                                              |                             | Two (n = 264)<br>199          |                                   | Three (n = 60)<br>47     |                             | One (n = 1)<br>1                         |                                   | Two (n = 264)<br>65          |                    | Three (n = 60)<br>13<br><i>p</i><br>0.19    |
| Number of feet care sessions provided to the ewes annually                    |                             |                               |                                   |                          |                             |                                          |                                   |                              |                    |                                             |
| No feet care provided<br>(n = 102)<br>77                                      |                             | 1 - 2 (n = 203)<br>153        |                                   | > 2 (n = 20)<br>16       |                             | No feet care provided<br>(n = 102)<br>25 |                                   | 1 - 2 (n = 203)<br>50        |                    | > 2 (n = 20)<br>4<br><i>p</i><br>0.90       |
| Administration of anthelmintic treatment during the last stage of pregnancy   |                             |                               |                                   |                          |                             |                                          |                                   |                              |                    |                                             |
| Yes (n = 224)<br>165                                                          |                             | No (n = 101)<br>81            |                                   | Yes (n = 223)<br>59      |                             | No (n = 102)<br>20                       |                                   |                              |                    | <i>p</i><br>0.20                            |
| Duration of grazing during the year                                           |                             |                               |                                   |                          |                             |                                          |                                   |                              |                    |                                             |
| No grazing (n = 44)<br>35                                                     | 1 - 5 months (n = 46)<br>34 | 6 - 10 months (n = 124)<br>86 | 11 - 12 months<br>(n = 111)<br>91 | No grazing (n = 44)<br>9 | 1 - 5 months (n = 46)<br>12 | 6 - 10 months (n = 124)<br>38            | 11 - 12 months<br>(n = 111)<br>20 |                              |                    | <i>p</i><br>0.14                            |
| Average quantity of hay provided daily to animals during the preceding season |                             |                               |                                   |                          |                             |                                          |                                   |                              |                    |                                             |
| ≤ 0.6 kg (n = 109)<br>85                                                      |                             | > 0.6 kg (n = 216)<br>161     |                                   | ≤ 0.6 kg (n = 109)<br>24 |                             | > 0.6 kg (n = 216)<br>55                 |                                   |                              |                    | <i>p</i><br>0.49                            |
| Provision of silage to adult animals                                          |                             |                               |                                   |                          |                             |                                          |                                   |                              |                    |                                             |
| Yes (n = 72)<br>52                                                            |                             | No (n = 253)<br>194           |                                   | Yes (n = 72)<br>20       |                             | No (n = 253)<br>59                       |                                   |                              |                    | <i>p</i><br>0.44                            |
| Provision of finished feed (concentrate) to adult animals throughout the year |                             |                               |                                   |                          |                             |                                          |                                   |                              |                    |                                             |
| Yes (n = 219)<br>164                                                          |                             | No (n = 106)<br>82            |                                   | Yes (n = 219)<br>55      |                             | No (n = 106)<br>24                       |                                   |                              |                    | <i>p</i><br>0.63                            |
| Type of finished feed (concentrate) to adult animals                          |                             |                               |                                   |                          |                             |                                          |                                   |                              |                    |                                             |
| Mash (n = 122)<br>85                                                          | Pelleted (n = 101)<br>82    | Flakes (n = 4)<br>3           | Crumbled<br>(n = 87)<br>67        | Other (n = 7)<br>6       | Mash (n = 122)<br>37        | Pelleted (n = 101)<br>19                 | Flakes (n = 4)<br>1               | Crumbled<br>(n = 87)<br>20   | Other (n = 7)<br>1 | <i>p</i><br>0.34                            |

| Length of previous animal farming experience |                                        |                     |                    |                                        |                   |
|----------------------------------------------|----------------------------------------|---------------------|--------------------|----------------------------------------|-------------------|
| ≤ 5 years (n = 74)                           |                                        | > 5 years (n = 251) | ≤ 5 years (n = 74) | > 5 years (n = 251)                    | <i>p</i>          |
| 57                                           |                                        | 189                 | 17                 | 62                                     | 0.76              |
| General education of farmer                  |                                        |                     |                    |                                        |                   |
| Primary (n = 57)                             | Secondary and post-secondary (n = 225) | Tertiary (n = 43)   | Primary (n = 57)   | Secondary and post-secondary (n = 225) | Tertiary (n = 43) |
| 36                                           | 179                                    | 31                  | 21                 | 46                                     | 12                |
|                                              |                                        |                     |                    |                                        | <i>p</i>          |
|                                              |                                        |                     |                    |                                        | 0.030             |
| Family tradition in farming                  |                                        |                     |                    |                                        |                   |
| Yes (n = 283)                                |                                        | No (n = 42)         | Yes (n = 283)      | No (n = 42)                            | <i>p</i>          |
| 213                                          |                                        | 33                  | 70                 | 9                                      | 0.64              |
| Presence of working staff in the farm        |                                        |                     |                    |                                        |                   |
| Yes (n = 123)                                |                                        | No (n = 202)        | Yes (n = 123)      | No (n = 202)                           | <i>p</i>          |
| 94                                           |                                        | 152                 | 29                 | 50                                     | 0.81              |

**Table S9.** Results of univariable analysis of variables ( $n = 19$ ) for evaluation of the outcome “fat and protein content in bulk-tank milk concurrently above the average contents found for all flocks” in 119 goat herds in Greece.

| Herds with fat or protein content in bulk-tank milk concurrently below the average content found for all herds |                                   |                                |                                | Herds with fat and protein content in bulk-tank milk concurrently above the average contents found for all herds |                                |                    |                    |                   |
|----------------------------------------------------------------------------------------------------------------|-----------------------------------|--------------------------------|--------------------------------|------------------------------------------------------------------------------------------------------------------|--------------------------------|--------------------|--------------------|-------------------|
| Average somatic cell counts in bulk-tank raw milk                                                              |                                   |                                |                                |                                                                                                                  |                                |                    |                    |                   |
| 0.904 × 10 <sup>6</sup> cells mL <sup>-1</sup>                                                                 |                                   |                                |                                | 0.683 × 10 <sup>6</sup> cells mL <sup>-1</sup>                                                                   |                                |                    |                    | <i>p</i><br>0.015 |
| Average total bacterial counts in bulk-tank raw milk                                                           |                                   |                                |                                |                                                                                                                  |                                |                    |                    |                   |
| 624 × 10 <sup>3</sup> cfu mL <sup>-1</sup>                                                                     |                                   |                                |                                | 528 × 10 <sup>3</sup> cfu mL <sup>-1</sup>                                                                       |                                |                    |                    | <i>p</i><br>0.59  |
| Proportion of <i>Teladorsagia</i> in pooled faecal samples                                                     |                                   |                                |                                |                                                                                                                  |                                |                    |                    |                   |
| 0%                                                                                                             | 1%-64%                            | ≥ 65%                          |                                | 0%                                                                                                               | 1%-64%                         | ≥ 65%              |                    | <i>P</i><br>0.012 |
| 9                                                                                                              | 42                                | 36                             |                                | 4                                                                                                                | 24                             | 4                  |                    |                   |
| Month into the lactation period at sampling                                                                    |                                   |                                |                                |                                                                                                                  |                                |                    |                    |                   |
| 0 – 1st (n = 8)                                                                                                | 2nd – 5th (n = 60)                | 6th – 9th (n = 43)             | After 9th (n = 8)              | 0 – 1st (n = 8)                                                                                                  | 2nd – 5th (n = 60)             | 6th – 9th (n = 43) | After 9th (n = 8)  | <i>p</i><br>0.005 |
| 2                                                                                                              | 42                                | 36                             | 7                              | 6                                                                                                                | 18                             | 7                  | 1                  |                   |
| Grazing land available to animals                                                                              |                                   |                                |                                |                                                                                                                  |                                |                    |                    |                   |
| ≤ 0.50 ac. per animal (n = 17)                                                                                 | 0.51-2.00 ac. per animal (n = 31) | > 2.00 ac. per animal (n = 71) | ≤ 0.50 ac. per animal (n = 17) | 0.51-2.00 ac. per animal (n = 31)                                                                                | > 2.00 ac. per animal (n = 71) |                    |                    | <i>p</i><br>0.96  |
| 12                                                                                                             | 23                                | 52                             | 5                              | 8                                                                                                                | 19                             |                    |                    |                   |
| Availability of milking parlour                                                                                |                                   |                                |                                |                                                                                                                  |                                |                    |                    |                   |
| Yes (n = 66)                                                                                                   |                                   | No (n = 53)                    | Yes (n = 66)                   |                                                                                                                  | No (n = 53)                    |                    |                    | <i>p</i><br>0.47  |
| 50                                                                                                             |                                   | 37                             | 16                             |                                                                                                                  | 16                             |                    |                    |                   |
| System pressure                                                                                                |                                   |                                |                                |                                                                                                                  |                                |                    |                    |                   |
| < 38 kPa (n = 5)                                                                                               | 38 - 42 kPa (n = 55)              | > 42 kPa (n = 6)               | < 38 kPa (n = 5)               | 38 - 42 kPa (n = 55)                                                                                             | > 42 kPa (n = 6)               |                    |                    | <i>p</i><br>0.30  |
| 4                                                                                                              | 43                                | 3                              | 1                              | 12                                                                                                               | 3                              |                    |                    |                   |
| Type of flow line                                                                                              |                                   |                                |                                |                                                                                                                  |                                |                    |                    |                   |
| High (n = 43)                                                                                                  | Low (n = 16)                      | Other (n = 7)                  | High (n = 43)                  | Low (n = 16)                                                                                                     | Other (n = 7)                  |                    |                    | <i>p</i><br>0.003 |
| 37                                                                                                             | 11                                | 2                              | 6                              | 5                                                                                                                | 5                              |                    |                    |                   |
| Breed of does                                                                                                  |                                   |                                |                                |                                                                                                                  |                                |                    |                    |                   |
| Alpine (n = 9)                                                                                                 | Crossbreeds (n = 18)              | Damascus (n = 18)              | Kefallinia (n = 1)             | Alpine (n = 9)                                                                                                   | Crossbreeds (n = 18)           | Damascus (n = 18)  | Kefallinia (n = 1) | <i>p</i><br>0.029 |
| 8                                                                                                              | 11                                | 17                             | 1                              | 1                                                                                                                | 7                              | 1                  | 0                  |                   |
| Local ( <i>Capra prisca</i> ) (n = 50)                                                                         | Murcia (n = 13)                   | Saanen (n = 5)                 | Skopelos (n = 5)               | Local ( <i>Capra prisca</i> ) (n = 50)                                                                           | Murcia (n = 13)                | Saanen (n = 5)     | Skopelos (n = 5)   |                   |
| 39                                                                                                             | 6                                 | 3                              | 2                              | 11                                                                                                               | 7                              | 2                  | 3                  |                   |

| Collaboration with a veterinarian                                             |  |                                                 |  |                              |  |                                                 |  | <i>p</i> |
|-------------------------------------------------------------------------------|--|-------------------------------------------------|--|------------------------------|--|-------------------------------------------------|--|----------|
| Yes (n = 101)<br>4                                                            |  | No (n = 18)<br>14                               |  | Yes (n = 101)<br>28          |  | No (n = 18)<br>4                                |  | 0.63     |
| Nutritional modifications performed according to the reproductive stage       |  |                                                 |  |                              |  |                                                 |  | <i>p</i> |
| Yes (n = 68)<br>54                                                            |  | No (n = 51)<br>33                               |  | Yes (n = 68)<br>14           |  | No (n = 51)<br>18                               |  | 0.07     |
| Age of kid removal from their dams                                            |  |                                                 |  |                              |  |                                                 |  | <i>p</i> |
| < 45 days (n = 26)<br>20                                                      |  | 45 – 60 days (n = 44)<br>32                     |  | > 60 days (n = 49)<br>35     |  | < 45 days (n = 26)<br>6                         |  | 0.88     |
|                                                                               |  |                                                 |  | 45 – 60 days (n = 44)<br>12  |  | > 60 days (n = 49)<br>14                        |  |          |
| Administration of anthelmintic treatment during the last stage of pregnancy   |  |                                                 |  |                              |  |                                                 |  | <i>p</i> |
| Yes (n = 75)<br>55                                                            |  | No (n = 44)<br>32                               |  | Yes (n = 75)<br>24           |  | No (n = 44)<br>8                                |  | 0.23     |
| Duration of grazing during the year                                           |  |                                                 |  |                              |  |                                                 |  | <i>p</i> |
| No grazing (n = 8)<br>5                                                       |  | 1 - 5 months (n = 13)<br>8                      |  | 6 - 10 months (n = 33)<br>25 |  | 11 - 12 months<br>(n = 65)<br>49                |  | 0.65     |
|                                                                               |  |                                                 |  |                              |  | No grazing (n = 8)<br>3                         |  |          |
|                                                                               |  |                                                 |  |                              |  | 1 - 5 months (n = 13)<br>5                      |  |          |
|                                                                               |  |                                                 |  |                              |  | 6 - 10 months (n = 33)<br>8                     |  |          |
|                                                                               |  |                                                 |  |                              |  | 11 - 12 months<br>(n = 65)<br>16                |  |          |
| Provision of hay as fodder to animals                                         |  |                                                 |  |                              |  |                                                 |  | <i>p</i> |
| Yes (n = 116)<br>84                                                           |  | No (n = 3)<br>3                                 |  | Yes (n = 116)<br>32          |  | No (n = 3)<br>0                                 |  | 0.29     |
| Average quantity of hay provided daily to animals during the preceding season |  |                                                 |  |                              |  |                                                 |  | <i>p</i> |
| ≤ 0.6 kg (n = 59)<br>44                                                       |  | > 0.6 kg (n = 60)<br>43                         |  | ≤ 0.6 kg (n = 59)<br>15      |  | > 0.6 kg (n = 60)<br>17                         |  | 0.72     |
| Provision of silage to adult animals                                          |  |                                                 |  |                              |  |                                                 |  | <i>p</i> |
| Yes (n = 18)<br>12                                                            |  | No (n = 101)<br>75                              |  | Yes (n = 18)<br>6            |  | No (n = 101)<br>26                              |  | 0.50     |
| Provision of finished feed (concentrate) to adult animals throughout the year |  |                                                 |  |                              |  |                                                 |  | <i>p</i> |
| Yes (n = 70)<br>52                                                            |  | No (n = 49)<br>35                               |  | Yes (n = 70)<br>18           |  | No (n = 49)<br>14                               |  | 0.73     |
| General education of farmer                                                   |  |                                                 |  |                              |  |                                                 |  | <i>p</i> |
| Primary (n = 20)<br>14                                                        |  | Secondary and post-<br>secondary (n = 89)<br>64 |  | Tertiary (n = 10)<br>9       |  | Primary (n = 20)<br>6                           |  | 0.45     |
|                                                                               |  |                                                 |  |                              |  | Secondary and post-<br>secondary (n = 89)<br>25 |  |          |
|                                                                               |  |                                                 |  |                              |  | Tertiary (n = 10)<br>1                          |  |          |
